# Supplementary material for: Beverage Consumption Patterns among Infants and Young Children (0–47.9 Months): Data from the Feeding Infants and Toddlers Study, 2016
Source: MDPI journal article supplement (doi:10.3390/nu10070825), 2018-06-26
Supplement: s1 [file s1]

**SUPPLEMENTARY TABLES**

**Table S1: Demographic characteristics of infants and young children (0-47.9 months old) participating in the Feeding Infants and Toddlers Study (FITS), 2016 (n=3235).**

| *Characteristics* | | *Total (N=3235)* | | *0-5.9 months (N=600)* | | *6-11.9 months (N=902)* | | *12-23.9 months (N=1133)* | | *24-35.9 months (N=305)* | | *36-47.9 months (N=295)* | |
| --- | --- | --- | --- | --- | --- | --- | --- | --- | --- | --- | --- | --- | --- |
| *%* | *SE* | *%* | *SE* | *%* | *SE* | *%* | *SE* | *%* | *SE* | *%* | *SE* |
| Child gender | Male | 51 | 0.88 | 50 | 2.04 | 54 | 1.66 | 50 | 1.49 | 49 | 2.86 | 45 | 2.90 |
|  | Female | 49 | 0.88 | 50 | 2.04 | 46 | 1.66 | 50 | 1.49 | 51 | 2.86 | 55 | 2.90 |
| Child's race/ethnicity | Hispanic | 15 | 0.62 | 16 | 1.50 | 14 | 1.16 | 14 | 1.04 | 14 | 1.98 | 14 | 2.04 |
| White (non-Hispanic) | 67 | 0.83 | 65 | 1.95 | 68 | 1.55 | 68 | 1.39 | 64 | 2.76 | 66 | 2.76 |
| Black (non-Hispanic) | 14 | 0.61 | 13 | 1.36 | 13 | 1.11 | 13 | 1.01 | 20 | 2.28 | 17 | 2.19 |
| Other (non-Hispanic) | 4.6 | 0.37 | 6.3 | 1.00 | 5.0 | 0.73 | 4.3 | 0.61 | 3.0 | 0.97 | 2.7 | 0.95 |
| Respondent's education | Less than high school diploma or GED | 4.3 | 0.36 | 4.7 | 0.86 | 3.9 | 0.64 | 3.4 | 0.54 | 5.9 | 1.35 | 6.5 | 1.43 |
| Completed high school or GED | 19 | 0.69 | 19 | 1.60 | 18 | 1.29 | 18 | 1.15 | 21 | 2.32 | 25 | 2.51 |
| Some college/postsecondary | 23 | 0.74 | 27 | 1.80 | 24 | 1.43 | 23 | 1.25 | 18 | 2.19 | 17 | 2.21 |
| Completed college | 38 | 0.86 | 37 | 1.97 | 38 | 1.62 | 41 | 1.46 | 36 | 2.75 | 36 | 2.79 |
| Some graduate work/degree | 15 | 0.63 | 13 | 1.36 | 15 | 1.19 | 15 | 1.06 | 20 | 2.28 | 16 | 2.14 |
| Mother's education | Less than high school diploma or GED | 3.9 | 0.38 | 4.1 | 0.89 | 3.4 | 0.67 | 3.4 | 0.61 | 5.7 | 1.53 | 5.5 | 1.54 |
| Completed high school or GED | 19 | 0.77 | 19 | 1.77 | 18 | 1.43 | 18 | 1.28 | 18 | 2.53 | 23 | 2.85 |
| Some college/postsecondary | 23 | 0.83 | 28 | 2.03 | 24 | 1.57 | 24 | 1.42 | 17 | 2.48 | 17 | 2.52 |
| Completed college | 40 | 0.96 | 38 | 2.19 | 40 | 1.80 | 42 | 1.64 | 37 | 3.19 | 41 | 3.33 |
| Some graduate work/degree | 14 | 0.69 | 11 | 1.38 | 15 | 1.31 | 13 | 1.13 | 23 | 2.77 | 14 | 2.37 |
| Respondent relationship to child | Biological/adoptive mother | 80 | 0.71 | 82 | 1.56 | 82 | 1.29 | 79 | 1.20 | 75 | 2.48 | 74 | 2.55 |
| Biological/adoptive father | 11 | 0.54 | 12 | 1.30 | 11 | 1.04 | 11 | 0.93 | 8.2 | 1.57 | 10 | 1.76 |
| Other | 10 | 0.52 | 6.2 | 0.98 | 7.4 | 0.87 | 10 | 0.88 | 17 | 2.14 | 16 | 2.11 |
| Respondent's current marital status | Married | 70 | 0.81 | 71 | 1.86 | 72 | 1.50 | 71 | 1.36 | 66 | 2.75 | 64 | 2.80 |
| Separated or divorced | 5.8 | 0.41 | 4.9 | 0.88 | 3.5 | 0.61 | 6.5 | 0.74 | 9.0 | 1.66 | 8.5 | 1.63 |
| Widowed | 0.8 | 0.16 | 0.7 | 0.33 | 0.1 | 0.11 | 0.5 | 0.22 | 2.3 | 0.87 | 2.7 | 0.95 |
| Never married | 11 | 0.55 | 9.0 | 1.17 | 11 | 1.05 | 11 | 0.92 | 13 | 1.93 | 14 | 2.02 |
| Living with partner | 12 | 0.58 | 15 | 1.44 | 14 | 1.14 | 11 | 0.94 | 10 | 1.76 | 11 | 1.82 |
| Household income level | Less than $10,000 | 8.5 | 0.49 | 9.3 | 1.19 | 8.0 | 0.90 | 8.2 | 0.82 | 11 | 1.78 | 7.5 | 1.53 |
| $10,000 to $19,999 | 9.3 | 0.51 | 9.3 | 1.19 | 9.2 | 0.96 | 8.1 | 0.81 | 11 | 1.75 | 13 | 1.93 |
| $20,000 to $34,999 | 18 | 0.67 | 18 | 1.57 | 21 | 1.35 | 18 | 1.13 | 14 | 1.97 | 14 | 1.99 |
| $35,000 to $49,999 | 17 | 0.66 | 17 | 1.55 | 18 | 1.29 | 17 | 1.11 | 12 | 1.87 | 15 | 2.07 |
| $50,000 to $74,999 | 20 | 0.70 | 20 | 1.64 | 19 | 1.30 | 22 | 1.23 | 19 | 2.26 | 16 | 2.13 |
| $75,000 to $99,999 | 14 | 0.61 | 14 | 1.40 | 13 | 1.14 | 13 | 1.00 | 15 | 2.05 | 17 | 2.17 |
| $100,000 to $149,999 | 10 | 0.53 | 8.3 | 1.13 | 8.9 | 0.95 | 11 | 0.91 | 14 | 1.99 | 12 | 1.91 |
| $150,000 or more | 3.9 | 0.34 | 3.7 | 0.77 | 2.9 | 0.56 | 4.1 | 0.59 | 4.3 | 1.16 | 6.8 | 1.46 |
| Low birth weight (< 2,500 grams) | | 8.7 | 0.50 | 6.2 | 0.98 | 9.0 | 0.95 | 8.3 | 0.82 | 10 | 1.71 | 14 | 1.99 |
| Employment | Respondent worked in last 30 days | 50 | 0.88 | 44 | 2.03 | 47 | 1.66 | 52 | 1.48 | 55 | 2.85 | 59 | 2.86 |
| Mother works | 47 | 0.98 | 37 | 2.17 | 43 | 1.82 | 49 | 1.67 | 57 | 3.27 | 60 | 3.32 |
| Father works | 84 | 1.97 | 91 | 3.39 | 78 | 4.22 | 89 | 2.84 | 80 | 8.00 | 73 | 8.07 |
| Ever breastfed or fed breast milk | | 82 | 0.68 | 86 | 1.41 | 85 | 1.20 | 81 | 1.17 | 77 | 2.40 | 73 | 2.60 |
| Anyone in household receiving benefits from SNAP | | 26 | 0.77 | 24 | 1.75 | 26 | 1.46 | 26 | 1.30 | 30 | 2.62 | 29 | 2.64 |
| Child attends preschool/daycare etc | | 36 | 0.83 | 24 | 1.74 | 31 | 1.53 | 36 | 1.42 | 52 | 2.86 | 64 | 2.78 |
| Child receives benefits from WIC | | 36 | 0.84 | 41 | 2.01 | 42 | 1.64 | 34 | 1.40 | 29 | 2.60 | 25 | 2.54 |
| Child's mother receives benefits from WIC | | 15 | 0.63 | 35 | 1.95 | 17 | 1.25 | 7.3 | 0.77 | 4.6 | 1.21 | 5.8 | 1.36 |
| Child is mother’s first born | | 34 | 0.93 | 36 | 2.16 | 37 | 1.79 | 35 | 1.59 | 22 | 2.73 | 25 | 2.96 |

**Table S2: Beverage consumption by age group (months): contribution of beverages to percentage of total daily energy intake (%TEI), per capita energy intake and per consumer energy intake from beverages on the day of the survey, FITS 2016 (n=3235).**

|  | **Percent total energy intake (+SE)** | | | | **kcal per capita (+SE)** | | | | **kcal per consumer (+SE)** | | | |
| --- | --- | --- | --- | --- | --- | --- | --- | --- | --- | --- | --- | --- |
|  | **0-5.9 months** | **6-11.9 months** | **12-23.9 months** | **24-47.9 months** | **0-5.9 months** | **6-11.9 months** | **12-23.9 months** | **24-47.9 months** | **0-5.9 months** | **6-11.9 months** | **12-23.9 months** | **24-47.9 months** |
| Baby milks1 | 93 (10) | 58 (10) | 4 (4) | 1 (2) | 604 (10) | 500 (10) | 43 (5) | 8 (2) | 612 (9) | 533 (9) | 268 (19) | 174 (43) |
| Breast milk | 42 (15) | 18 (9) | 2 (3) | 0 (2) | 276 (15) | 155 (9) | 27 (3) | 5 (2) | 516 (11) | 395 (8) | 226 (15) | 135 (34) |
| Infant formula | 51 (19) | 40 (14) | 1 (2) | 0 (2) | 328 (19) | 344 (14) | 12 (2) | 3 (2) | 528 (18) | 531 (14) | 284 (31) | 268 (134) |
| Milks2 | 1 (3) | 2 (4) | 18 (7) | 11 (9) | 5 (3) | 24 (5) | 237 (7) | 176 (9) | 243 (87) | 228 (33) | 272 (7) | 210 (10) |
| Whole cow’s milk | 1 (3) | 2 (4) | 15 (7) | 4 (8) | 4 (3) | 17 (4) | 191 (7) | 68 (9) | 323 (95) | 294 (51) | 286 (9) | 252 (21) |
| Reduced fat cow’s milk | 0 | 0 | 2 (3) | 3 (5) | 0 (0) | 6 (1) | 30 (3) | 56 (5) | 38 (29) | 161 (33) | 208 (13) | 166 (11) |
| Low-fat cow’s milk | 0 | 0 | 1 (1) | 2 (5) | 0 (0) | 1 (1) | 7 (1) | 41(5) | 19 (0) | 116 (65) | 146 (17) | 179 (13) |
| non-fat cow’s milk | 0 | 0 | 0 | 0 | 0 (0) | 0 | 2 (1) | 6 (1) | 72 (0) | 7 (0) | 82 (16) | 110 (13) |
| Flavored cow’s milk | 0 | 0 | 1 (2) | 2 (4) | 0 | 0 | 8 (2) | 24 (4) | NA | 53 (32) | 133 (20) | 160 (15) |
| 100% Juice | 0 | 1 (2) | 4 (3) | 4 (4) | 2 (1) | 19 (2) | 52 (3) | 53 (4) | 43 (11) | 70 (7) | 104 (5) | 113 (7) |
| SSBs3 | 0 | 1 (1) | 3 (3) | 4 (4) | 0 (0) | 5 (1) | 29 (3) | 53 (4) | 42 (13) | 56 (7) | 100 (7) | 116 (6) |
| Fruit flavored drinks | 0 | 1 (1) | 2 (3) | 3 (4) | 0 (0) | 4 (1) | 24 (3) | 39 (4) | 47 (13) | 60 (8) | 104 (7) | 112 (7) |
| Soft drinks | 0 | 0 | 0 | 1 (2) | 0 | 0 (0) | 2 (1) | 8 (2) | NA | 14 (4) | 58 (12) | 85 (17) |

1For 12-23.9 and 24-47.9 month olds, the percent total energy intake from baby milks includes 0% (3) and 0% (0) from toddler milk, respectively.

2Includes flavored and unflavored cow, goat and plant-based milks

3Includes fruit flavored drinks, soft drinks and sweetened tea and coffee

**Table S3. The ranking of beverages as sources of energy and nutrients among all foods and beverages consumed on the day of the survey for young children participating in FITS 2016 (n=1733).**

| **Food group** | **Age** | **Energy** | | **Saturated fat** | | **Added Sugar** | | **Calcium** | | **Vitamin D** | | **Vitamin E** | | **Vitamin A** | | **Zinc** | |
| --- | --- | --- | --- | --- | --- | --- | --- | --- | --- | --- | --- | --- | --- | --- | --- | --- | --- |
| **Rank1** | **%2** | **Rank** | **%** | **Rank** | **%** | **Rank** | **%** | **Rank** | **%** | **Rank** | **%** | **Rank** | **%** | **Rank** | **%** |
| **Milk3** | **12-23.9m** | 1 | 18 | 1 | 36 | NA | NA | 1 | 49 | 1 | 69 | 2 | 12 | 1 | 30 | 1 | 22 |
| **24-47.9m** | 1 | 11 | 1 | 19 | NA | NA | 1 | 39 | 1 | 61 | 4 | 7 | 1 | 27 | 1 | 16 |
| **100% Juice** | **12-23.9m** | 8 | 4 | NA | NA | NA | NA | 8 | 2 | NA | NA | 16 | 2 | NA | NA | NA | NA |
| **24-47.9m** | 10 | 4 | NA | NA | NA | NA | 7 | 3 | NA | NA | 13 | 3 | NA | NA | NA | NA |
| **Sugar-sweetened beverages4** | **12-23.9m** | 12 | 3 | NA | NA | 1 | 17 | NA | NA | NA | NA | NA | NA | NA | NA | NA | NA |
| **24-47.9m** | 10 | 4 | NA | NA | 1 | 21 | NA | NA | NA | NA | NA | NA | NA | NA | NA | NA |

**1**These values represent the rank among all foods and beverages that were consumed on the day of the survey. Values presented here only include beverages that ranked in the top 20 foods and beverages that contributed >90% in total of energy intakes in children 12-47.9 months on the day of the survey.

2These values represent the percent of total intake of the nutrient listed on the day of the survey that the beverage contributed.

3Includes flavored and unflavored cow, goat and plant-based milks

4Includes fruit flavored drinks, soft drinks and tea and coffee
